# Supplementary material for: The Predictive Value of Gut Microbiota Composition for Sustained Immunogenicity following Two Doses of CoronaVac
Source: MDPI journal article supplement (doi:10.3390/ijms25052583), 2024-02-23
Supplement: s1 [file s1]

## SUPPLEMENTARY METHODS

### *Serological test and shotgun metagenomic sequencing*

The new version of the iFlash-2019-nCoV NAb kit (chemiluminescent microparticle immunoassay; Shenzhen YHLO Biotech Co, Ltd., Shenzhen, China) was used to test for neutralizing antibody (NAbs) against SARS-CoV-2 receptor-binding domain (RBD). Briefly, serum samples was placed in the sample loading area while a reagent pack containing 2019-nCoV RBD antigen (30KD)-coated paramagnetic microparticles and acroдинium ester-labelled ACE2 conjugate was placed in the reagent loading area. The iFlash system then performed all functions automatically and signals elicited from the chemiluminescent reactions were measured. NAb seroconversion was defined as  $\geq 15$  AU/mL.

We extracted total genomic DNA from the stool samples using Qiagen QIAamp DNA stool Mini Kit (Qiagen, Hilden, Germany) in accordance with the manufacturer's instructions. Nextera DNA Library Prep Kit (Illumina, California, USA) was then used to subject the genomic DNA to library preparation for shotgun metagenomic sequencing. In brief, the genomic DNA was first fragmented and tagged with adapter sequences by engineered transposome. Next, limited cycle PCR was used to add the index adapter sequences to these tagged DNA. After amplification, the PCR amplicons were purified using AMPure XP beads (Beckman-Coulter). The quality of the DNA library was then assessed by a Qubit fluorometer (Thermo Fisher Scientific) followed by a Bioanalyzer (Agilent Technologies). After library preparation, next-generation shotgun metagenomic sequencing was performed using the Illumina NovaSeq 6000 platform (Illumina, San Diego, US) running at paired-end 150 bp, which yielded 10 Gb raw data per sample at the Center for PanorOmic Sciences (CPOS) of the University of Hong Kong (HKU).

## SUPPLEMENTARY FIGURES

**Figure S1.** Comparison of baseline alpha diversity index (Shannon, Simpson, Richness) of gut microbiota between seropositive and seronegative vaccinees of CoronaVac at day 180.

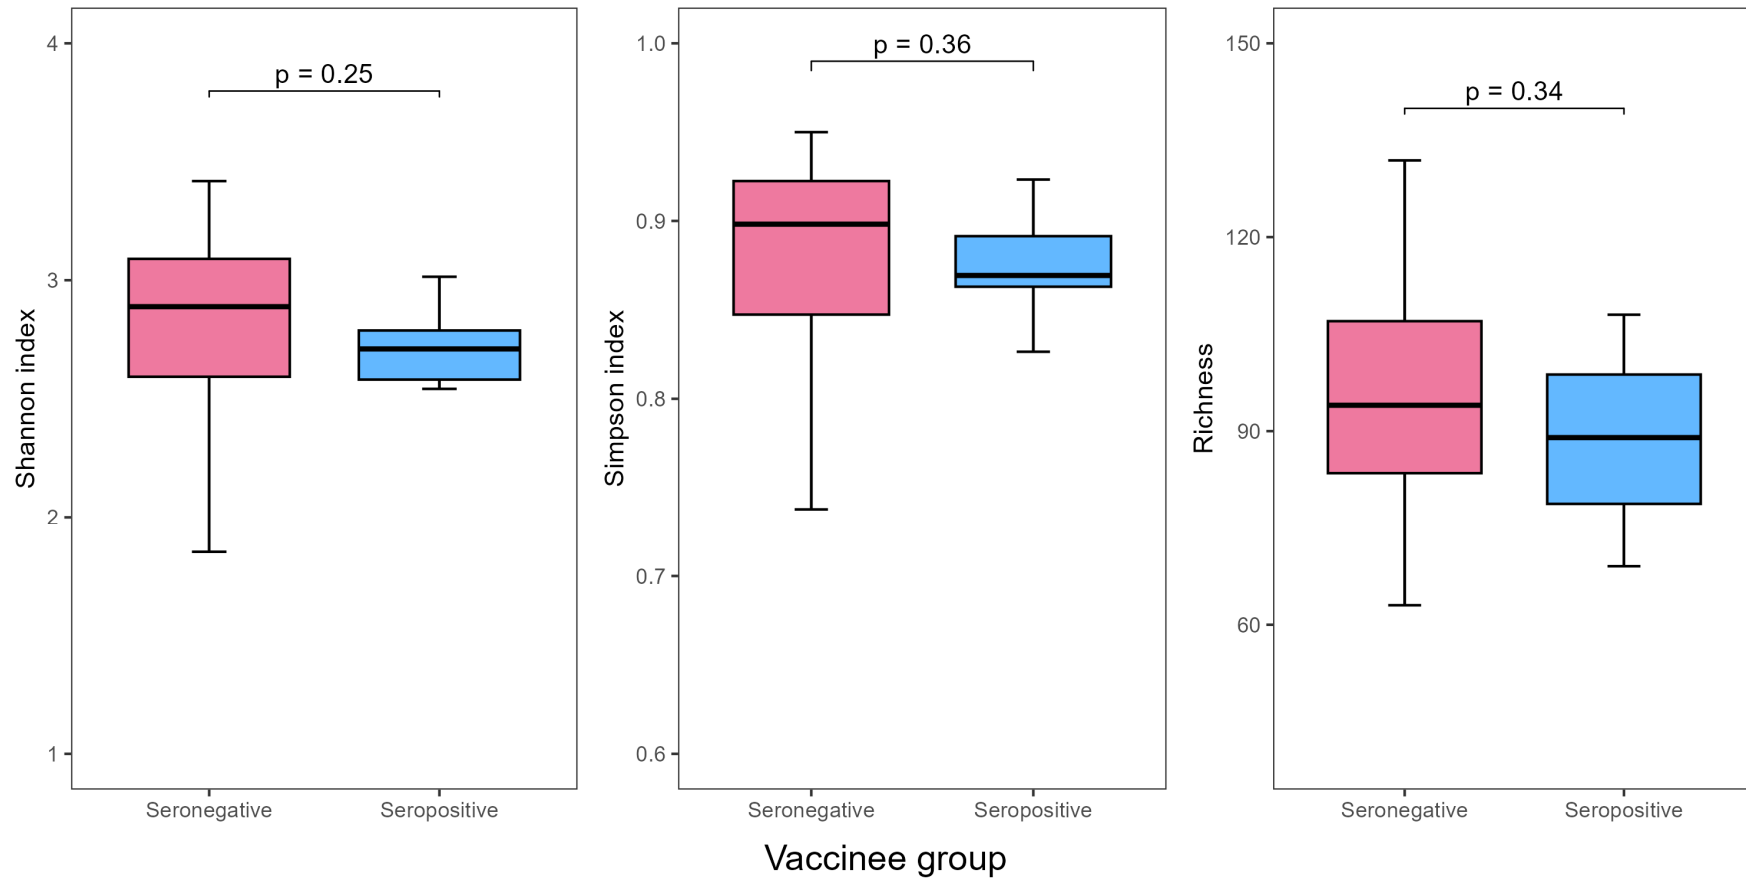

**Figure S2.** Comparison of baseline beta diversity between seropositive and seronegative vaccinees of CoronaVac at day 180.

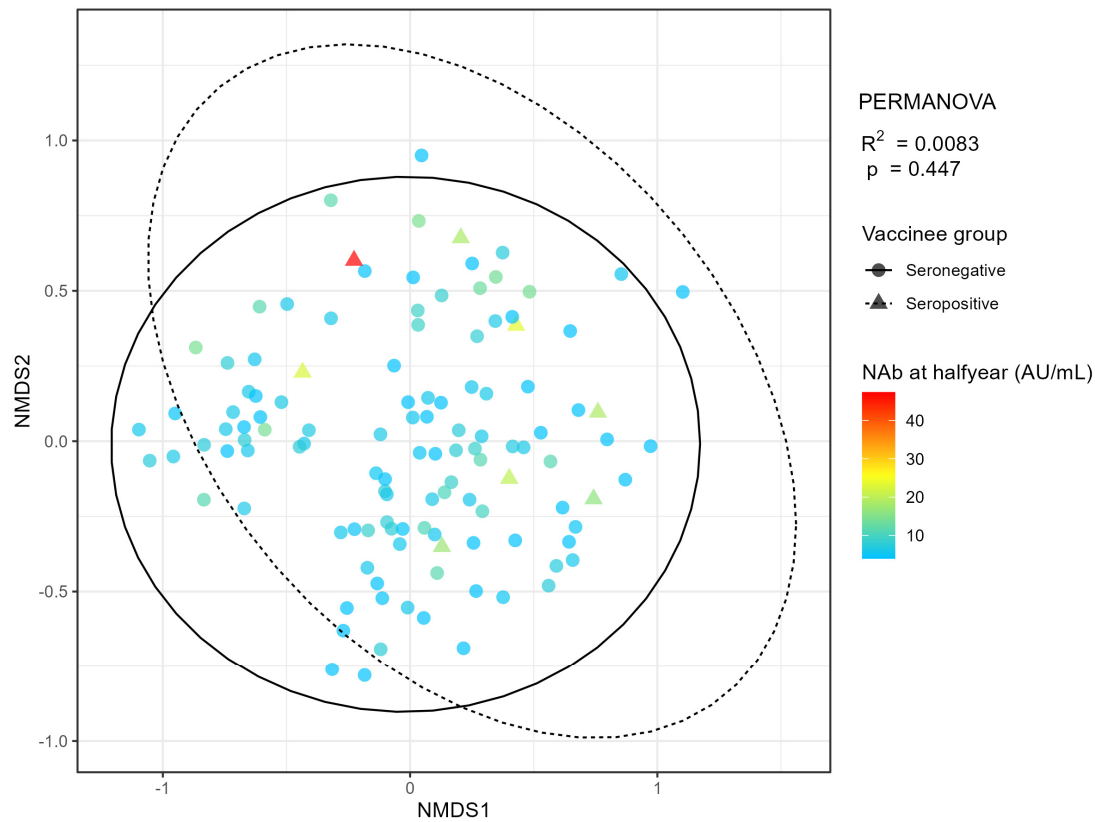

Abbreviations: NAb, neutralising antibody.

**Figure S3.** Baseline metabolic pathways enriched in seropositive and seronegative vaccinees of CoronaVac at day 180.

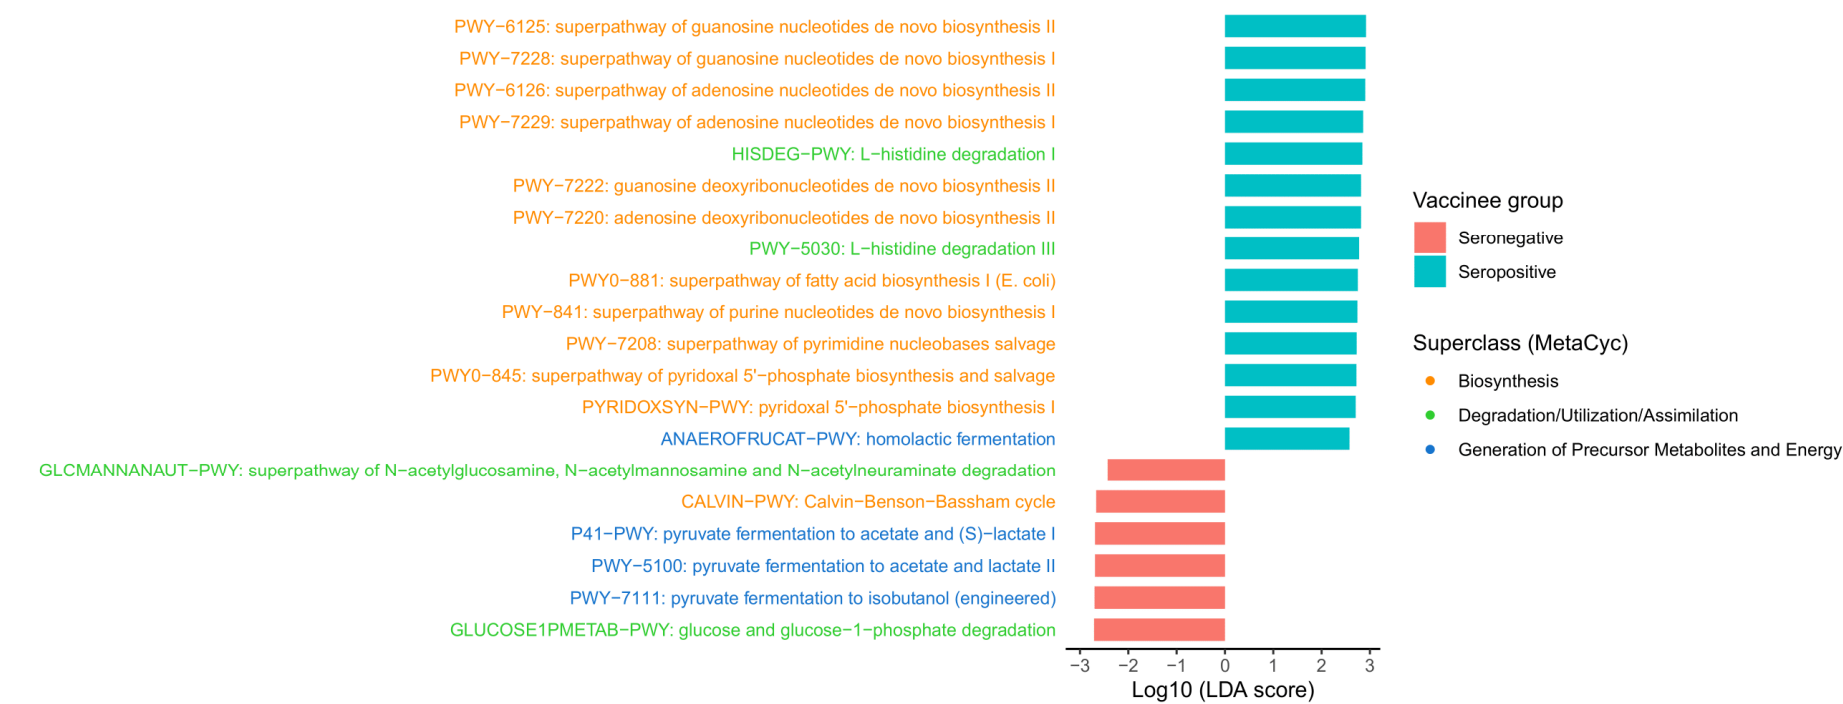

**Figure S4.** Comparison of baseline alpha and beta diversity index of gut microbiota between CoronaVac recipients with and without any adverse reactions after first dose (A,B) and second dose (C,D).

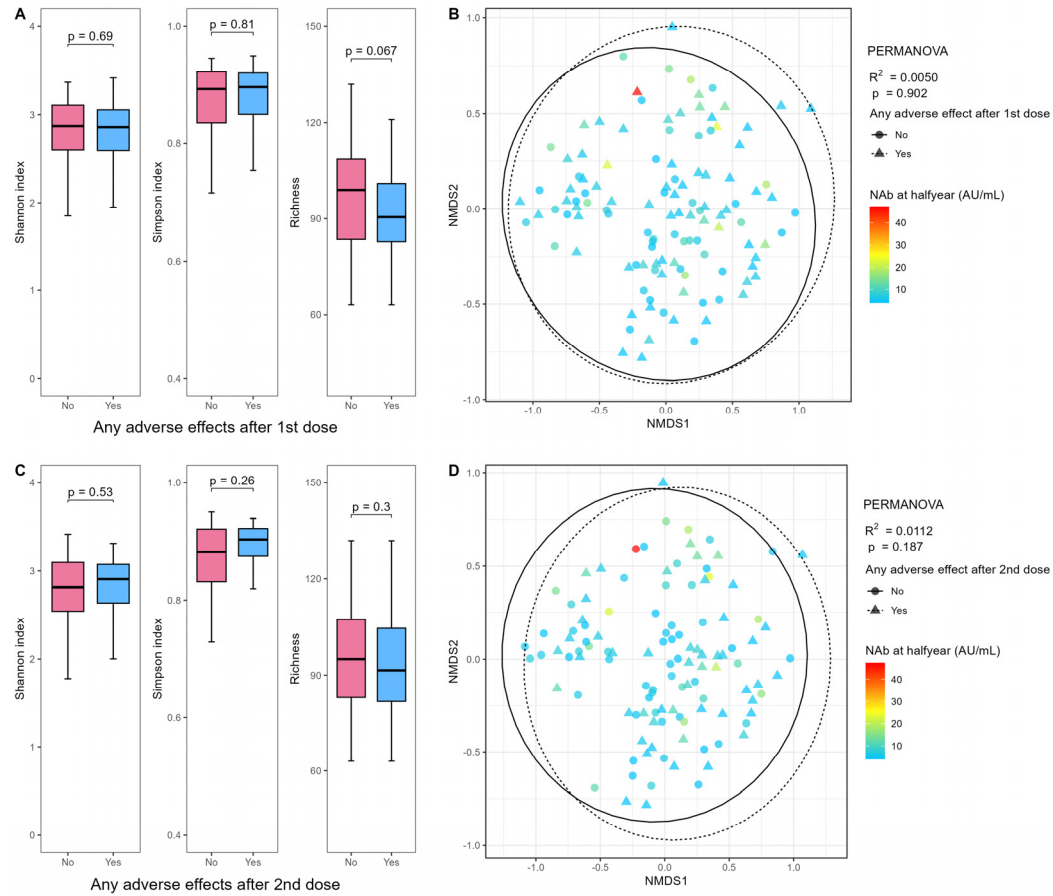

Abbreviations: NAb, neutralising antibody.

**Figure S5.** Baseline gut bacterial species enriched in CoronaVac recipients with and without any adverse reactions after first dose.

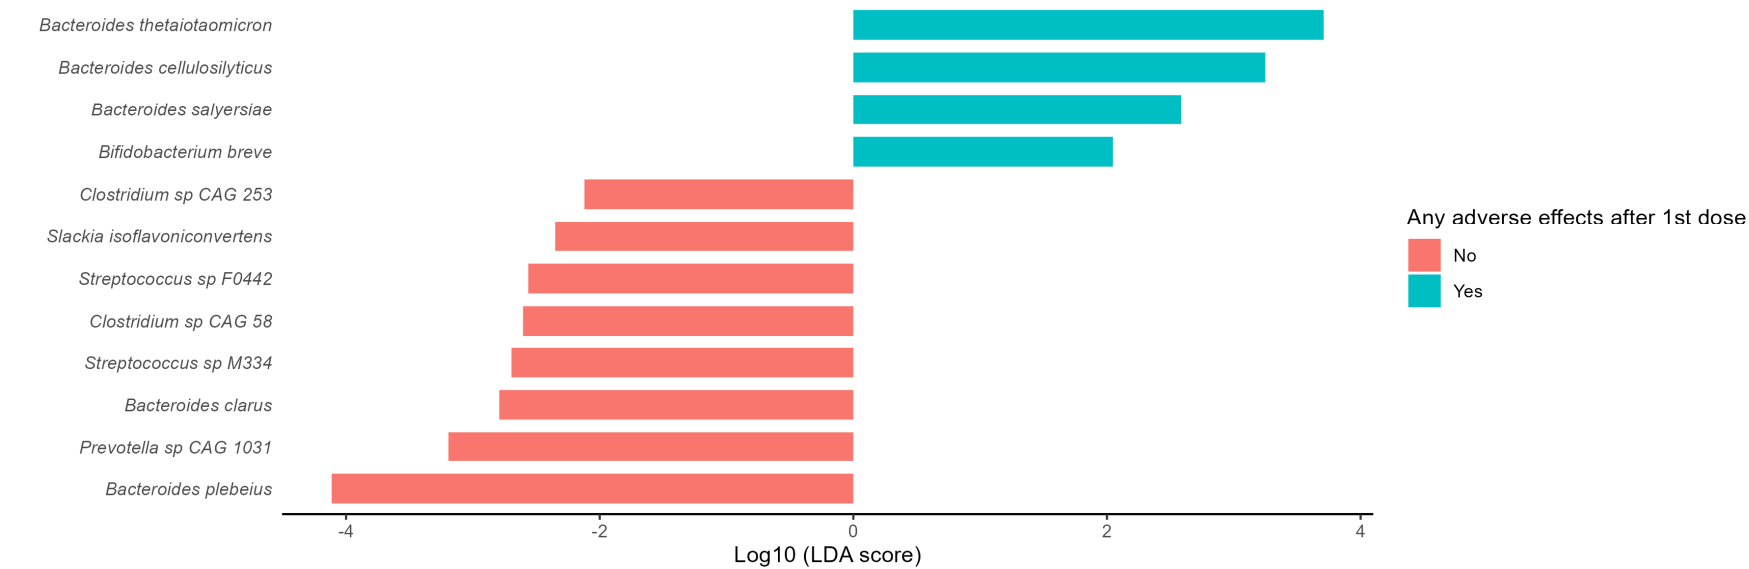

**Figure S6.** Relative abundances of baseline gut bacterial species among CoronaVac recipients with and without any adverse reactions after first dose.

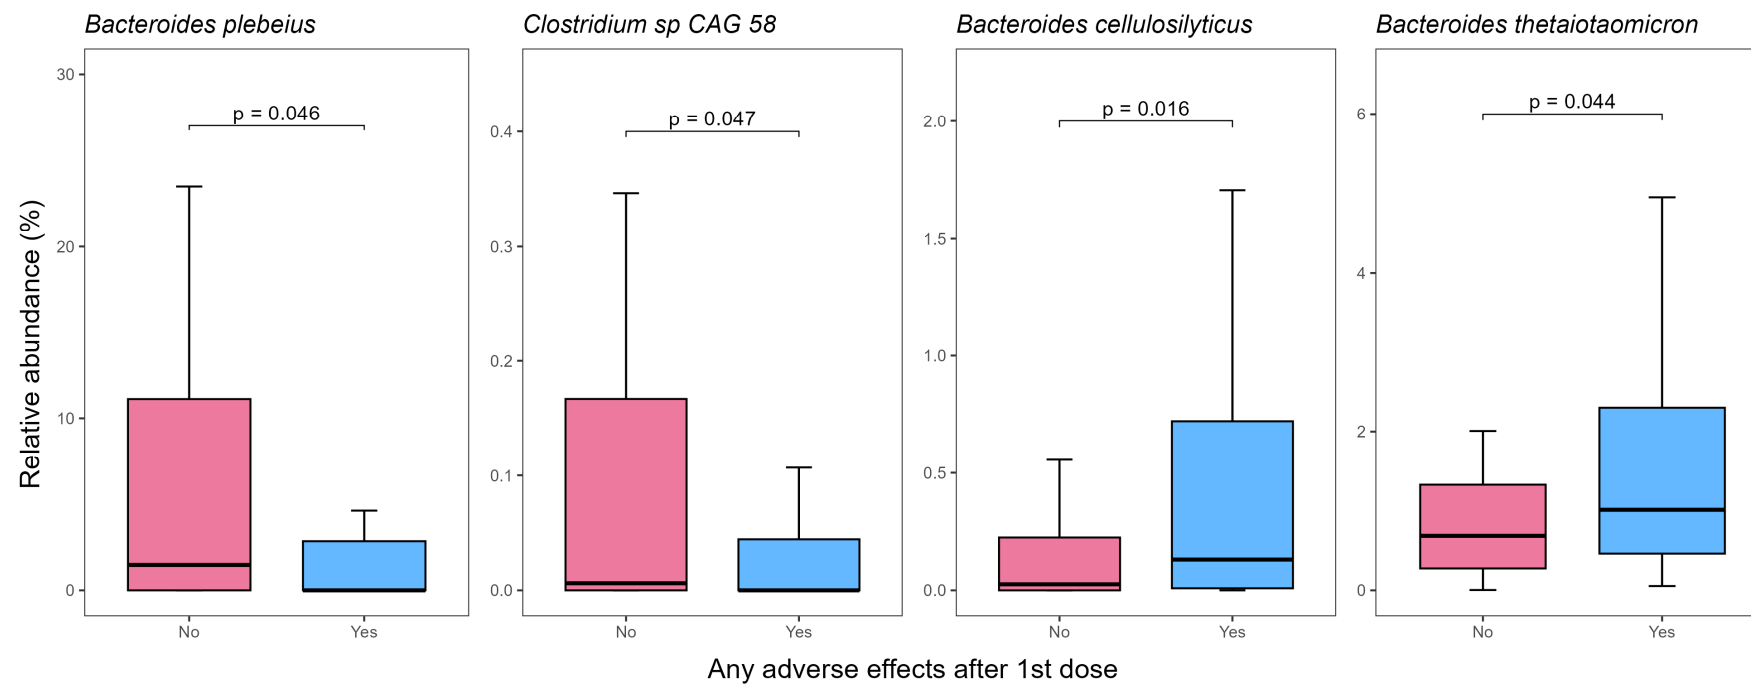

**Figure S7.** Baseline gut bacterial species enriched in CoronaVac recipients with and without any adverse reactions after second dose.

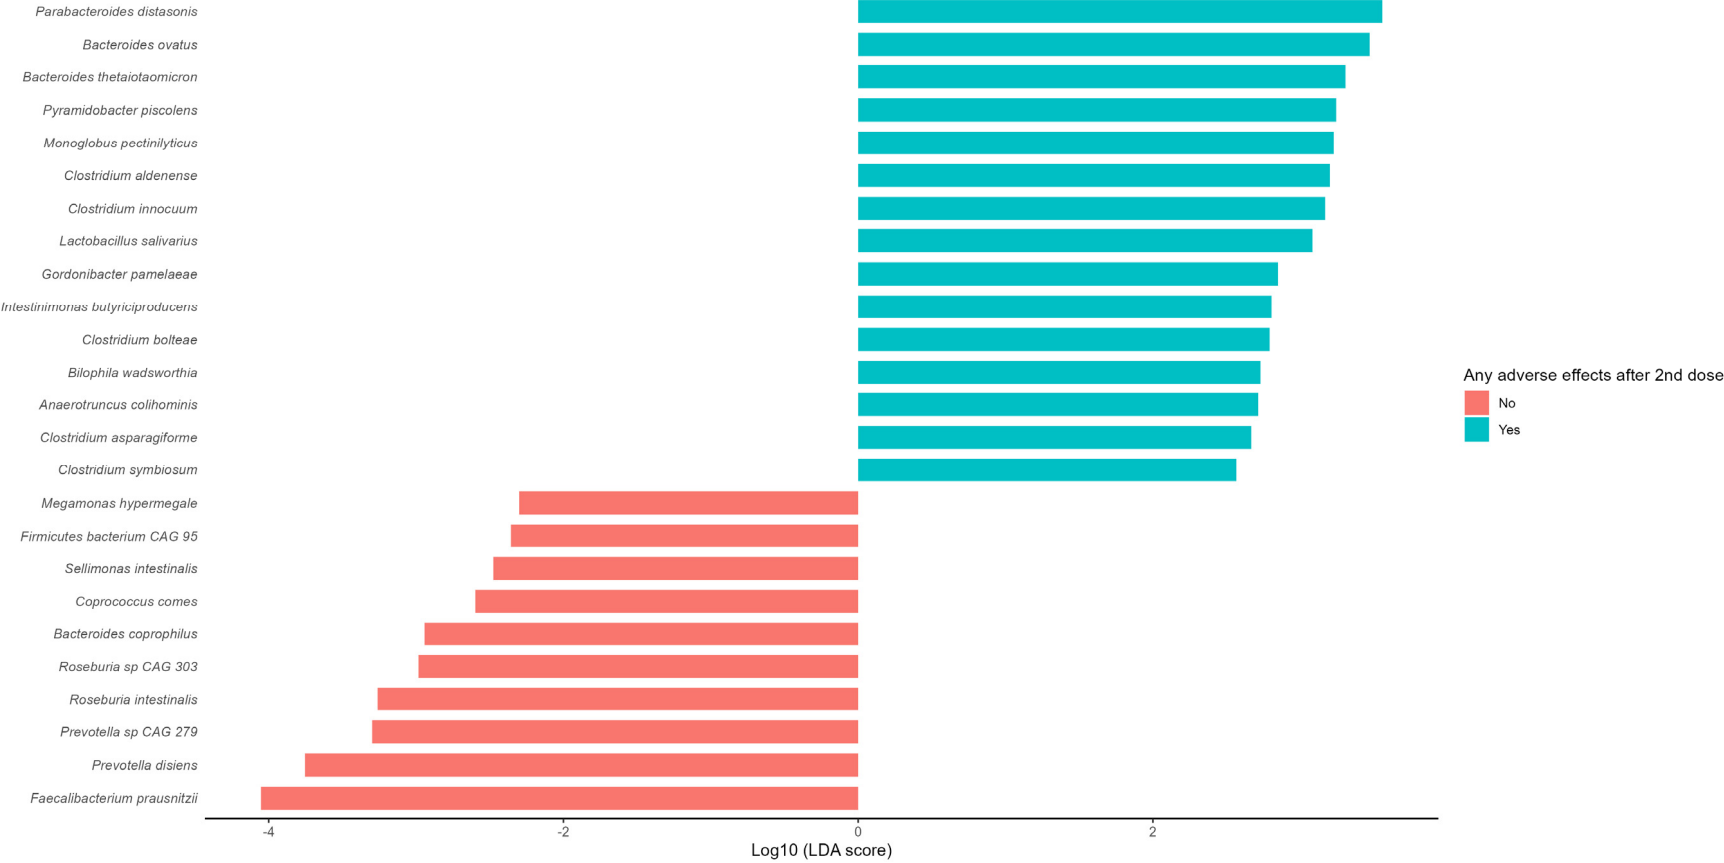



**Figure S8.** Relative abundances of baseline gut bacterial species among CoronaVac recipients with and without any adverse reactions after second dose.

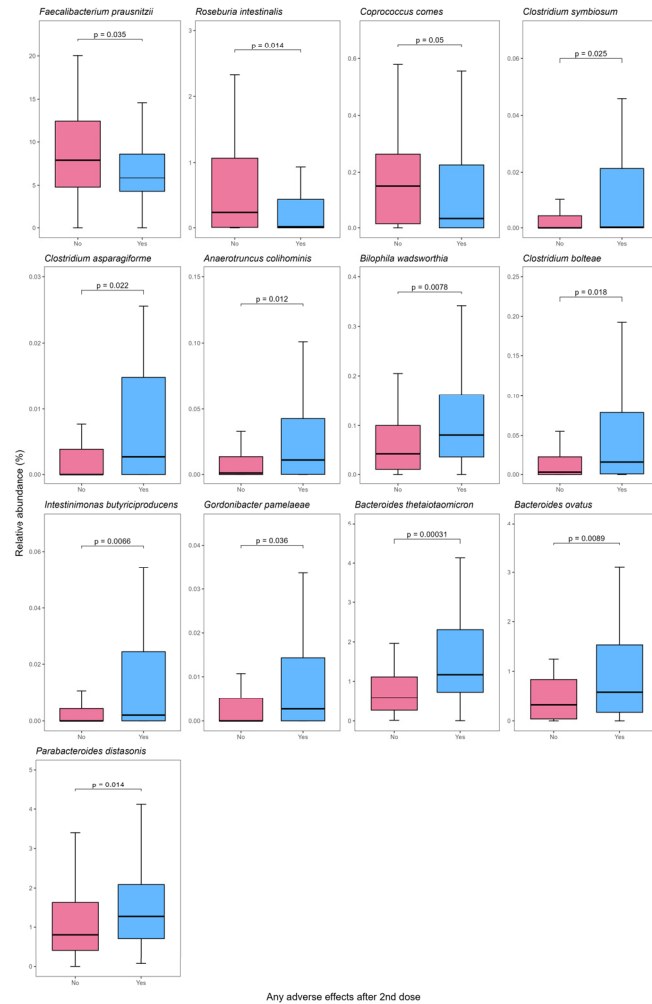

**Table S1.** Summary of discriminant metabolic pathways and their linear discriminant analysis (LDA) scores between seropositive and seronegative vaccinees.

| Abbreviation                                          | Full name                                                                                    | Vaccinee group | LDA score    |
|-------------------------------------------------------|----------------------------------------------------------------------------------------------|----------------|--------------|
| <b>Biosynthesis</b>                                   |                                                                                              |                |              |
| PWY-6125                                              | Superpathway of guanosine nucleotides de novo biosynthesis II                                | Seropositive   | 2.918297708  |
| PWY-7228                                              | Superpathway of guanosine nucleotides de novo biosynthesis I                                 | Seropositive   | 2.909620881  |
| PWY-6126                                              | Superpathway of adenosine nucleotides de novo biosynthesis II                                | Seropositive   | 2.902566476  |
| PWY-7229                                              | Superpathway of adenosine nucleotides de novo biosynthesis I                                 | Seropositive   | 2.858972474  |
| PWY-7220                                              | Adenosine deoxyribonucleotides de novo biosynthesis II                                       | Seropositive   | 2.815763329  |
| PWY-7222                                              | Guanosine deoxyribonucleotides de novo biosynthesis II                                       | Seropositive   | 2.815763329  |
| PWY0-881                                              | Superpathway of fatty acid biosynthesis I (E. coli)                                          | Seropositive   | 2.74922346   |
| PWY-841                                               | Superpathway of purine nucleotides de novo biosynthesis I                                    | Seropositive   | 2.740703799  |
| PWY-7208                                              | Superpathway of pyrimidine nucleobases salvage                                               | Seropositive   | 2.724565669  |
| PWY0-845                                              | Superpathway of pyridoxal 5'-phosphate biosynthesis and salvage                              | Seropositive   | 2.719245409  |
| PYRIDOXYN-PWY                                         | Pyridoxal 5'-phosphate biosynthesis I                                                        | Seropositive   | 2.70511082   |
| CALVIN-PWY                                            | Calvin-Benson-Bassham cycle                                                                  | Seronegative   | -2.666094237 |
| <b>Degradation/Utilization/Assimilation</b>           |                                                                                              |                |              |
| HISDEG-PWY                                            | L-histidine degradation I                                                                    | Seropositive   | 2.843740954  |
| PWY-5030                                              | L-histidine degradation III                                                                  | Seropositive   | 2.775629447  |
| GLCMANNANAUT-PWY                                      | Superpathway of N-acetylglucosamine, N-acetylmannosamine and N-acetylneuraminate degradation | Seronegative   | -2.427773229 |
| GLUCOSE1PMETAB-PWY                                    | Glucose and glucose-1-phosphate degradation                                                  | Seronegative   | -2.709637614 |
| <b>Generation of Precursor Metabolites and Energy</b> |                                                                                              |                |              |
| ANAEROFRUCAT-PWY                                      | Homolactic fermentation                                                                      | Seropositive   | 2.5764582    |
| PWY-5100                                              | Pyruvate fermentation to acetate and lactate II                                              | Seronegative   | -2.689333461 |
| P41-PWY                                               | Pyruvate fermentation to acetate and (S)-lactate I                                           | Seronegative   | -2.689333461 |
| PWY-7111                                              | Pyruvate fermentation to isobutanol (engineered)                                             | Seronegative   | -2.698671441 |

**Table S2.** Adverse reactions after first and second dose of CoronaVac.

|                                                                   | <u>After 1st dose</u> |              |         | <u>After 2nd dose*</u> |              |         |
|-------------------------------------------------------------------|-----------------------|--------------|---------|------------------------|--------------|---------|
|                                                                   | Seronegative          | Seropositive | p-value | Seronegative           | Seropositive | p-value |
|                                                                   | (n = 111)             | (n = 8)      |         | (n = 108)              | (n = 8)      |         |
| <b>Total adverse reactions within 7 days after each injection</b> |                       |              |         |                        |              |         |
| Any                                                               | 63 (56.8%)            | 5 (62.5%)    | >0.999  | 51 (47.2%)             | 1 (12.5%)    | 0.072   |
| Grade 3 or above <sup>#</sup>                                     | 0 (0.0%)              | 0 (0.0%)     | --      | 0 (0.0%)               | 0 (0.0%)     | --      |
| <b>Injection site adverse reactions</b>                           |                       |              |         |                        |              |         |
| Any                                                               | 48 (43.2%)            | 5 (62.5%)    | 0.464   | 40 (37.0%)             | 1 (12.5%)    | 0.257   |
| Pain                                                              | 47 (42.3%)            | 5 (62.5%)    | 0.295   | 37 (34.3%)             | 1 (12.5%)    | 0.27    |
| Redness                                                           | 3 (2.7%)              | 0 (0.0%)     | >0.999  | 8 (7.4%)               | 0 (0.0%)     | >0.999  |
| Swelling                                                          | 6 (5.4%)              | 0 (0.0%)     | >0.999  | 4 (3.7%)               | 0 (0.0%)     | >0.999  |
| Itching                                                           | 3 (2.7%)              | 0 (0.0%)     | >0.999  | 3 (2.8%)               | 0 (0.0%)     | >0.999  |
| Echymoses                                                         | 0 (0.0%)              | 0 (0.0%)     | --      | 0 (0.0%)               | 0 (0.0%)     | --      |
| <b>Systemic adverse reactions</b>                                 |                       |              |         |                        |              |         |
| Any                                                               | 45 (40.5%)            | 1 (12.5%)    | 0.149   | 31 (28.7%)             | 0 (0.0%)     | 0.107   |
| Fever                                                             | 3 (2.7%)              | 0 (0.0%)     | >0.999  | 1 (0.9%)               | 0 (0.0%)     | >0.999  |
| Chills and rigors                                                 | 2 (1.8%)              | 0 (0.0%)     | >0.999  | 0 (0.0%)               | 0 (0.0%)     | --      |
| Muscle pain                                                       | 12 (10.8%)            | 1 (12.5%)    | >0.999  | 9 (8.3%)               | 0 (0.0%)     | >0.999  |

|                 |            |           |        |            |          |        |
|-----------------|------------|-----------|--------|------------|----------|--------|
| Joint pain      | 2 (1.8%)   | 0 (0.0%)  | >0.999 | 3 (2.8%)   | 0 (0.0%) | >0.999 |
| Headache        | 13 (11.7%) | 1 (12.5%) | >0.999 | 10 (9.3%)  | 0 (0.0%) | >0.999 |
| Fatigue         | 31 (27.9%) | 1 (12.5%) | 0.681  | 17 (15.7%) | 0 (0.0%) | 0.602  |
| Nausea          | 6 (5.4%)   | 0 (0.0%)  | >0.999 | 2 (1.9%)   | 0 (0.0%) | >0.999 |
| Vomiting        | 1 (0.9%)   | 0 (0.0%)  | >0.999 | 1 (0.9%)   | 0 (0.0%) | >0.999 |
| Diarrhoea       | 4 (3.6%)   | 0 (0.0%)  | >0.999 | 3 (2.8%)   | 0 (0.0%) | >0.999 |
| Skin rash       | 4 (3.6%)   | 0 (0.0%)  | >0.999 | 2 (1.9%)   | 0 (0.0%) | >0.999 |
| Facial dropping | 1 (0.9%)   | 0 (0.0%)  | >0.999 | 0 (0.0%)   | 0 (0.0%) | --     |

---

\* Missing data: 3 after second dose; # Grade 3 or above: severe or life-threatening reactions.
